# Supplementary material for: A simple PCR-SSP method for detection of HLA-B*15:02, *15:13, and *15:21
Source: publisher site journal article supplement (doi:10.1515/tjb-2022-0202), 2023-02-07
Supplement: Supplementary file 1 [file j_tjb-2022-0202_suppl_003.docx]

**Supplemental Material 3**

Results interpretation

| Samples | Gel picture | F1R1  (Lane 1) | F2R2  (Lane 2) | F3R3  (Lane 3) | F4R4  (Lane 4) | F5R5  (Lane 5) | F6R3  (Lane 6) | Results |
| --- | --- | --- | --- | --- | --- | --- | --- | --- |
| HSB3C | 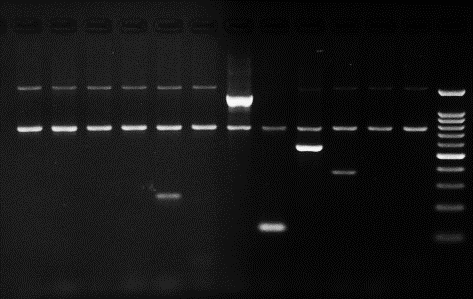  1 2 3 4 5 6 | **√** | **√** | **√** | **√** |  |  | 15:02 |
| HSB17 | 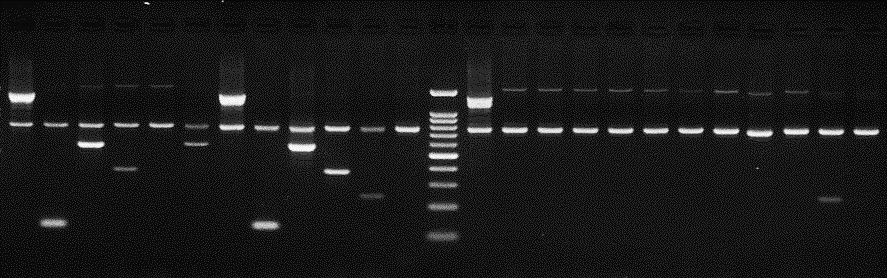  1 2 3 4 5 6 | **√** | **√** | **√** | **√** | **√** |  | 15:13 |
| HSB34C | 1 2 3 4 5 6 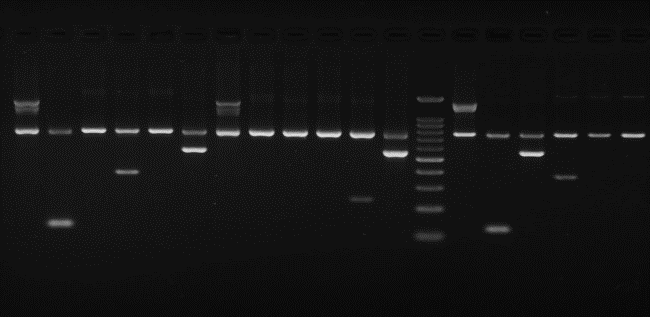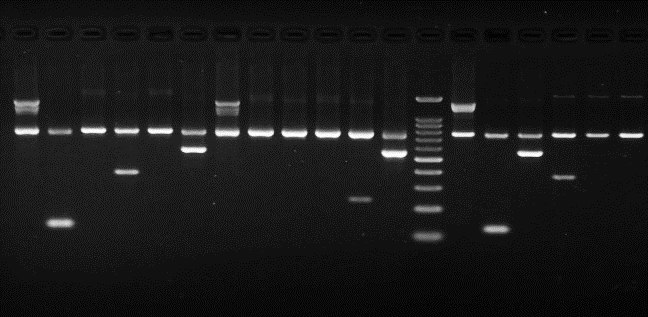 | **√** | **√** |  | **√** |  | **√** | 15:21 |
